# Supplementary material for: Role of the reaction of stabilized Criegee intermediates with peroxy radicals in particle formation and growth in air
Source: Royal Society of Chemistry journal article supplement (doi:10.1039/c5cp01171j), 2015-01-01
Supplement: c5cp01171j1.pdf [file c5cp01171j1.pdf]

## Supplementary Information

### Role of the Reaction of Stabilized Criegee Intermediates with Peroxy Radicals in Particle Formation and Growth in Air

Yue Zhao, Lisa M. Wingen, Véronique Perraud, John Greaves, and Barbara J.  
Finlayson-Pitts\*

Department of Chemistry, University of California, Irvine, CA, 92697

\*Corresponding author:

Email: [bjfinlay@uci.edu](mailto:bjfinlay@uci.edu); phone: (949) 824-7670; fax: (949) 824-2420

## 1. Box model description

Table S1 lists the mechanisms of the ozonolysis of *trans*-3-hexene used in the box model. It is known that the production of OH radicals in alkene ozonolysis includes prompt OH formation by fast decomposition of excited Criegee intermediates (CI) and secondary OH formation from relatively slow thermal decomposition of stabilized CI (SCI). Experimental and theoretical studies have shown that ozonolysis of *trans*-3-hexene has a very low prompt OH yield (near zero) but high SCI yields at atmospheric pressure.<sup>1,2</sup> However, the rate constant of thermal decomposition ( $k_{\text{thermal}}$ ) of *trans*-3-hexene SCI is not known. The  $k_{\text{thermal}}$  has been reported for a few small alkenes including ethene, 2,3-dimethyl-2-butene, and *trans*-2-butene, but the values differ widely, ranging from 2.5 to 250 s<sup>-1</sup>.<sup>2-6</sup> In the model, a prompt OH yield of 0.05, SCI yield of 0.8, and  $k_{\text{thermal}}$  of 30 s<sup>-1</sup> were used. The rate constants of all ROOH + SCI reactions are assumed to be the same as that of RO<sub>2</sub> + SCI as recommended by Vereecken *et al.*,<sup>7</sup> *i.e.*, 5 × 10<sup>-12</sup> cm<sup>3</sup> molecules<sup>-1</sup> s<sup>-1</sup>.

Table S1 Mechanisms of *trans*-3-hexene ozonolysis in the box model

| #  | Reaction                                                                                                                | $k_{(298\text{K})}$ (s <sup>-1</sup> or cm <sup>3</sup> molecule <sup>-1</sup> s <sup>-1</sup> ) | Reference |
|----|-------------------------------------------------------------------------------------------------------------------------|--------------------------------------------------------------------------------------------------|-----------|
| 1  | C <sub>6</sub> H <sub>12</sub> + O <sub>3</sub> → C <sub>2</sub> H <sub>5</sub> CHO + C <sub>3</sub> H <sub>6</sub> OOE | 1.6×10 <sup>-16</sup>                                                                            | 8         |
| 2  | C <sub>3</sub> H <sub>6</sub> OOE → C <sub>3</sub> H <sub>6</sub> OO                                                    | 0.8*1.0×10 <sup>6</sup>                                                                          | MCM v3.2  |
| 3  | C <sub>3</sub> H <sub>6</sub> OOE → C <sub>2</sub> H <sub>5</sub> O <sub>2</sub> + CO + OH                              | 0.05*1.0×10 <sup>6</sup>                                                                         | MCM v3.2  |
| 4  | C <sub>3</sub> H <sub>6</sub> OOE → C <sub>2</sub> H <sub>5</sub> O <sub>2</sub> + HO <sub>2</sub>                      | 0.05*1.0×10 <sup>6</sup>                                                                         | MCM v3.2  |
| 5  | C <sub>3</sub> H <sub>6</sub> OOE → C <sub>2</sub> H <sub>6</sub> + CO <sub>2</sub>                                     | 0.05*1.0×10 <sup>6</sup>                                                                         | MCM v3.2  |
| 6  | C <sub>3</sub> H <sub>6</sub> OOE → C <sub>2</sub> H <sub>5</sub> C(O)OH                                                | 0.05*1.0×10 <sup>6</sup>                                                                         | MCM v3.2  |
| 7  | C <sub>3</sub> H <sub>6</sub> OO → C <sub>2</sub> H <sub>5</sub> O <sub>2</sub> + CO + OH                               | 30                                                                                               | —         |
| 8  | C <sub>2</sub> H <sub>5</sub> O <sub>2</sub> + HO <sub>2</sub> → C <sub>2</sub> H <sub>5</sub> OOH                      | 7.8×10 <sup>-12</sup>                                                                            | MCMv3.2   |
| 9  | C <sub>2</sub> H <sub>5</sub> O <sub>2</sub> + RO <sub>2</sub> → C <sub>2</sub> H <sub>5</sub> OH                       | 0.2*3.4×10 <sup>-13</sup>                                                                        | MCMv3.2   |
| 10 | C <sub>2</sub> H <sub>5</sub> O <sub>2</sub> + RO <sub>2</sub> → CH <sub>3</sub> CHO                                    | 0.2*3.4×10 <sup>-13</sup>                                                                        | MCMv3.2   |
| 11 | C <sub>2</sub> H <sub>5</sub> O <sub>2</sub> + RO <sub>2</sub> → C <sub>2</sub> H <sub>5</sub> O                        | 0.6*3.4×10 <sup>-13</sup>                                                                        | MCMv3.2   |
| 12 | C <sub>2</sub> H <sub>5</sub> OOH + OH → C <sub>2</sub> H <sub>5</sub> O <sub>2</sub>                                   | 3.6×10 <sup>-12</sup>                                                                            | MCMv3.2   |
| 13 | C <sub>2</sub> H <sub>5</sub> OOH + OH → CH <sub>3</sub> CHO + OH                                                       | 8.0×10 <sup>-12</sup>                                                                            | MCM v3.2  |
| 14 | C <sub>2</sub> H <sub>5</sub> O → CH <sub>3</sub> CHO + HO <sub>2</sub>                                                 | 3.5×10 <sup>4</sup>                                                                              | MCM v3.2  |
| 15 | CH <sub>3</sub> CHO + OH → CH <sub>3</sub> C(O)O <sub>2</sub>                                                           | 1.5×10 <sup>-11</sup>                                                                            | MCM v3.2  |
| 16 | CH <sub>3</sub> C(O)O <sub>2</sub> + HO <sub>2</sub> → CH <sub>3</sub> O <sub>2</sub> + OH                              | 0.44*1.4×10 <sup>-11</sup>                                                                       | MCM v3.2  |
| 17 | CH <sub>3</sub> C(O)O <sub>2</sub> + HO <sub>2</sub> → CH <sub>3</sub> C(O)OOH                                          | 0.41*1.4×10 <sup>-11</sup>                                                                       | MCMv3.2   |
| 18 | CH <sub>3</sub> C(O)O <sub>2</sub> + HO <sub>2</sub> → CH <sub>3</sub> C(O)OH + O <sub>3</sub>                          | 0.15*1.4×10 <sup>-11</sup>                                                                       | MCM v3.2  |
| 19 | CH <sub>3</sub> C(O)O <sub>2</sub> + RO <sub>2</sub> → CH <sub>3</sub> O <sub>2</sub>                                   | 0.7*2.6×10 <sup>-12</sup>                                                                        | MCM v3.2  |

|                                       |                                                                                                                                                                                                      |                            |          |
|---------------------------------------|------------------------------------------------------------------------------------------------------------------------------------------------------------------------------------------------------|----------------------------|----------|
| 20                                    | $\text{CH}_3\text{C}(\text{O})\text{O}_2 + \text{RO}_2 \rightarrow \text{CH}_3\text{C}(\text{O})\text{OH}$                                                                                           | $0.3*2.6 \times 10^{-12}$  | MCM v3.2 |
| 21                                    | $\text{C}_6\text{H}_{12} + \text{OH} \rightarrow \text{HERO}_2$                                                                                                                                      | $6.7 \times 10^{-11}$      | 8        |
| 22                                    | $\text{HERO}_2 + \text{HO}_2 \rightarrow \text{HEOOH}$                                                                                                                                               | $0.75*2.4 \times 10^{-11}$ | MCM v3.2 |
| 23                                    | $\text{HERO}_2 + \text{HO}_2 \rightarrow \text{HRO} + \text{OH}$                                                                                                                                     | $0.25*2.4 \times 10^{-11}$ | MCM v3.2 |
| 24                                    | $\text{HERO}_2 + \text{RO}_2 \rightarrow \text{C}_2\text{H}_5\text{C}(\text{O})\text{C}(\text{OH})\text{C}_2\text{H}_5$                                                                              | $0.2*8.8 \times 10^{-13}$  | MCM v3.2 |
| 25                                    | $\text{HERO}_2 + \text{RO}_2 \rightarrow \text{C}_2\text{H}_5\text{C}(\text{OH})\text{C}(\text{OH})\text{C}_2\text{H}_5$                                                                             | $0.2*8.8 \times 10^{-13}$  | MCM v3.2 |
| 26                                    | $\text{HERO}_2 + \text{RO}_2 \rightarrow \text{HERO}$                                                                                                                                                | $0.6*8.8 \times 10^{-13}$  | MCM v3.2 |
| 27                                    | $\text{HERO} \rightarrow \text{C}_2\text{H}_5\text{CHO} + \text{C}_2\text{H}_5\text{CHO} + \text{HO}_2$                                                                                              | $2.3 \times 10^7$          | MCM v3.2 |
| 28                                    | $\text{HERO} \rightarrow \text{C}_2\text{H}_5\text{C}(\text{O})\text{C}(\text{OH})\text{C}_2\text{H}_5 + \text{HO}_2$                                                                                | $1.0 \times 10^6$          | MCM v3.2 |
| 29                                    | $\text{HEOOH} + \text{OH} \rightarrow \text{HERO}_2$                                                                                                                                                 | $3.6 \times 10^{-12}$      | MCM v3.2 |
| 30                                    | $\text{HEOOH} + \text{OH} \rightarrow \text{C}_2\text{H}_5\text{C}(\text{O})\text{C}(\text{OH})\text{C}_2\text{H}_5 + \text{OH}$                                                                     | $3.6 \times 10^{-11}$      | MCM v3.2 |
| 31                                    | $\text{C}_2\text{H}_5\text{C}(\text{O})\text{C}(\text{OH})\text{C}_2\text{H}_5 + \text{OH} \rightarrow \text{C}_2\text{H}_5\text{C}(\text{O})\text{C}(\text{O})\text{C}_2\text{H}_5 + \text{HO}_2$   | $1.0 \times 10^{-11}$      | MCM v3.2 |
| 32                                    | $\text{C}_2\text{H}_5\text{C}(\text{OH})\text{C}(\text{OH})\text{C}_2\text{H}_5 + \text{OH} \rightarrow \text{C}_2\text{H}_5\text{C}(\text{O})\text{C}(\text{OH})\text{C}_2\text{H}_5 + \text{HO}_2$ | $2.1 \times 10^{-11}$      | MCM v3.2 |
| 33                                    | $\text{C}_2\text{H}_5\text{CHO} + \text{OH} \rightarrow \text{C}_2\text{H}_5\text{C}(\text{O})\text{O}_2$                                                                                            | $2.0 \times 10^{-11}$      | 8        |
| 34                                    | $\text{C}_2\text{H}_5\text{C}(\text{O})\text{O}_2 + \text{HO}_2 \rightarrow \text{C}_2\text{H}_5\text{O}_2 + \text{OH}$                                                                              | $0.44*1.4 \times 10^{-11}$ | MCM v3.2 |
| 35                                    | $\text{C}_2\text{H}_5\text{C}(\text{O})\text{O}_2 + \text{HO}_2 \rightarrow \text{C}_2\text{H}_5\text{C}(\text{O})\text{OOH}$                                                                        | $0.41*1.4 \times 10^{-11}$ | MCM v3.2 |
| 36                                    | $\text{C}_2\text{H}_5\text{C}(\text{O})\text{O}_2 + \text{HO}_2 \rightarrow \text{C}_2\text{H}_5\text{C}(\text{O})\text{OH} + \text{O}_3$                                                            | $0.15*1.4 \times 10^{-11}$ | MCM v3.2 |
| 37                                    | $\text{C}_2\text{H}_5\text{C}(\text{O})\text{O}_2 + \text{RO}_2 \rightarrow \text{C}_2\text{H}_5\text{O}_2$                                                                                          | $0.7*1.0 \times 10^{-11}$  | MCM v3.2 |
| 38                                    | $\text{C}_2\text{H}_5\text{C}(\text{O})\text{O}_2 + \text{RO}_2 \rightarrow \text{C}_2\text{H}_5\text{C}(\text{O})\text{OH}$                                                                         | $0.3*1.0 \times 10^{-11}$  | MCM v3.2 |
| 39                                    | $\text{C}_2\text{H}_5\text{C}(\text{O})\text{OOH} + \text{OH} \rightarrow \text{C}_2\text{H}_5\text{C}(\text{O})\text{O}_2$                                                                          | $4.4 \times 10^{-12}$      | MCM v3.2 |
| 40                                    | $\text{C}_2\text{H}_5\text{C}(\text{O})\text{OH} + \text{OH} \rightarrow \text{C}_2\text{H}_5\text{O}_2$                                                                                             | $1.2 \times 10^{-12}$      | MCM v3.2 |
| 41                                    | $\text{OH} + \text{O}_3 \rightarrow \text{HO}_2 + \text{O}_2$                                                                                                                                        | $7 \times 10^{-14}$        | MCM v3.2 |
| 42                                    | $\text{OH} + \text{CO} \rightarrow \text{CO}_2 + \text{HO}_2$                                                                                                                                        | $2.1 \times 10^{-13}$      | MCM v3.2 |
| 43                                    | $\text{HO}_2 + \text{HO}_2 \rightarrow \text{H}_2\text{O}_2$                                                                                                                                         | $1.7 \times 10^{-10}$      | MCM v3.2 |
| 44                                    | $\text{OH} + \text{H}_2\text{O}_2 \rightarrow \text{HO}_2 + \text{H}_2\text{O}$                                                                                                                      | $4.6 \times 10^{-12}$      | MCM v3.2 |
| 45                                    | $\text{HO}_2 + \text{O}_3 \rightarrow \text{OH} + \text{O}_2$                                                                                                                                        | $2.0 \times 10^{-15}$      | MCM v3.2 |
| 46                                    | $\text{C}_3\text{H}_6\text{OO} + \text{C}_2\text{H}_5\text{CHO} \rightarrow \text{C}_2\text{H}_5\text{CHO} + \text{C}_2\text{H}_5\text{C}(\text{O})\text{OH}$                                        | $0.04*1.7 \times 10^{-12}$ | 9        |
| 47                                    | $\text{C}_3\text{H}_6\text{OO} + \text{C}_2\text{H}_5\text{CHO} \rightarrow \text{SOZ1}$                                                                                                             | $0.96*1.7 \times 10^{-12}$ | 9        |
| 48                                    | $\text{C}_3\text{H}_6\text{OO} + \text{CH}_3\text{CHO} \rightarrow \text{C}_2\text{H}_5\text{CHO} + \text{CH}_3\text{C}(\text{O})\text{OH}$                                                          | $0.04*1.7 \times 10^{-12}$ | 9        |
| 49                                    | $\text{C}_3\text{H}_6\text{OO} + \text{CH}_3\text{CHO} \rightarrow \text{SOZ2}$                                                                                                                      | $0.96*1.7 \times 10^{-12}$ | 9        |
| 50                                    | $\text{C}_3\text{H}_6\text{OO} + \text{C}_2\text{H}_5\text{C}(\text{O})\text{OH} \rightarrow \text{PPOOH}$                                                                                           | $2.6 \times 10^{-12}$      | 3,10     |
| 51                                    | $\text{C}_3\text{H}_6\text{OO} + \text{HEOOH} \rightarrow \text{OLIOOH11}$                                                                                                                           | $5 \times 10^{-12}$        | —        |
| 52                                    | $\text{C}_3\text{H}_6\text{OO} + \text{OLIOOH11} \rightarrow \text{OLIOOH12}$                                                                                                                        | $5 \times 10^{-12}$        | —        |
| 53                                    | $\text{C}_3\text{H}_6\text{OO} + \text{OLIOOH12} \rightarrow \text{OLIOOH13}$                                                                                                                        | $5 \times 10^{-12}$        | —        |
| 54                                    | $\text{C}_3\text{H}_6\text{OO} + \text{OLIOOH13} \rightarrow \text{OLIOOH14}$                                                                                                                        | $5 \times 10^{-12}$        | —        |
| 55                                    | $\text{C}_3\text{H}_6\text{OO} + \text{OLIOOH14} \rightarrow \text{OLIOOH15}$                                                                                                                        | $5 \times 10^{-12}$        | —        |
| 56                                    | $\text{C}_3\text{H}_6\text{OO} + \text{OLIOOH15} \rightarrow \text{OLIOOH16}$                                                                                                                        | $5 \times 10^{-12}$        | —        |
| 57                                    | $\text{C}_3\text{H}_6\text{OO} + \text{OLIOOH16} \rightarrow \text{OLIOOH17}$                                                                                                                        | $5 \times 10^{-12}$        | —        |
| <b>In the presence of formic acid</b> |                                                                                                                                                                                                      |                            |          |
| 58                                    | $\text{HCOOH} + \text{C}_3\text{H}_6\text{OO} \rightarrow \text{FPOOH}$                                                                                                                              | $2.1 \times 10^{-12}$      | 3,10     |
| 59                                    | $\text{HCOOH} + \text{OH} \rightarrow \text{HO}_2$                                                                                                                                                   | $4.5 \times 10^{-13}$      | MCM v3.2 |
| 60                                    | $\text{C}_3\text{H}_6\text{OO} + \text{FPOOH} \rightarrow \text{OLIOOH21}$                                                                                                                           | $5 \times 10^{-12}$        | —        |
| 61                                    | $\text{C}_3\text{H}_6\text{OO} + \text{OLIOOH21} \rightarrow \text{OLIOOH22}$                                                                                                                        | $5 \times 10^{-12}$        | —        |
| 62                                    | $\text{C}_3\text{H}_6\text{OO} + \text{OLIOOH22} \rightarrow \text{OLIOOH23}$                                                                                                                        | $5 \times 10^{-12}$        | —        |

|    |                                            |                     |   |
|----|--------------------------------------------|---------------------|---|
| 63 | $C_3H_6OO + OLIOOH23 \rightarrow OLIOOH24$ | $5 \times 10^{-12}$ | — |
| 64 | $C_3H_6OO + OLIOOH24 \rightarrow OLIOOH25$ | $5 \times 10^{-12}$ | — |
| 65 | $C_3H_6OO + OLIOOH25 \rightarrow OLIOOH26$ | $5 \times 10^{-12}$ | — |
| 66 | $C_3H_6OO + OLIOOH26 \rightarrow OLIOOH27$ | $5 \times 10^{-12}$ | — |

Note:

(1) The reaction mechanisms for ozonolysis and OH oxidation of *trans*-3-hexene were based on those for *trans*-2-pentene and/or *trans*-2-hexene in the Master Chemical Mechanism (MCM v3.2, <http://mcm.leeds.ac.uk/MCM/home.htm>).

(2) The reactions highlighted in blue are newly added (not included in MCM v3.2). The numbers highlighted in red are reaction branching ratios.

(3)  $C_3H_6OOE$ : excited CI;  $C_3H_6OO$ : stabilized CI;  $HEOOH$ : *trans*-3-hexene derived hydroperoxide from  $HE-RO_2 + HO_2$  reaction;  $FPOOH$ : 3-formyloxypropyl hydroperoxide from formic acid + SCI reaction;  $OLIOOH1n$  and  $OLIOOH2n$  ( $n = 1-7$ ): oligomers from  $HEOOH + n$  SCI and  $FPOOH + n$  SCI, respectively.

## References:

- 1 J. H. Kroll, J. S. Clarke, N. M. Donahue, J. G. Anderson and K. L. Demerjian, *J. Phys. Chem. A*, 2001, **105**, 1554-1560.
- 2 J. H. Kroll, S. R. Sahay, J. G. Anderson, K. L. Demerjian and N. M. Donahue, *J. Phys. Chem. A*, 2001, **105**, 4446-4457.
- 3 T. Berndt, T. Jokinen, R. L. Mauldin, T. Petaja, H. Herrmann, H. Junninen, P. Paasonen, D. R. Worsnop and M. Sipila, *J. Phys. Chem. Lett.*, 2012, **3**, 2892-2896.
- 4 M. Olzmann, E. Kraka, D. Cremer, R. Gutbrod and S. Andersson, *J. Phys. Chem. A*, 1997, **101**, 9421-9429.
- 5 J. D. Fenske, A. S. Hasson, A. W. Ho and S. E. Paulson, *J. Phys. Chem. A*, 2000, **104**, 9921-9932.
- 6 K. T. Kuwata, M. R. Hermes, M. J. Carlson and C. K. Zogg, *J. Phys. Chem. A*, 2010, **114**, 9192-9204.
- 7 L. Vereecken, H. Harder and A. Novelli, *Phys. Chem. Chem. Phys.*, 2012, **14**, 14682-14695.
- 8 R. Atkinson and J. Arey, *Chem. Rev.*, 2003, **103**, 4605-4638.
- 9 D. Stone, M. Blitz, L. Daubney, N. U. M. Howes and P. Seakins, *Phys. Chem. Chem. Phys.*, 2014, **16**, 1139-1149.
- 10 M. Sipila, T. Jokinen, T. Berndt, S. Richters, R. Makkonen, N. M. Donahue, R. L. Mauldin, T. Kurten, P. Paasonen, N. Sarnela, M. Ehn, H. Junninen, M. P. Rissanen, J. Thornton, F. Stratmann, H. Herrmann, D. R. Worsnop, M. Kulmala, V. M. Kerminen and T. Petaja, *Atmos. Chem. Phys.*, 2014, **14**, 12143-12153.
